# Supplementary material for: Land subsidence dynamics and their interplay with spatial and temporal land-use transitions in the Douala coastland, Cameroon
Source: Copernicus journal article supplement (doi:10.5194/egusphere-2025-336), 2025-04-30
Supplement: Supplementary file [file Supplementary materials.pdf › Supplementary materials.pdf]

## 1 Supplementary materials

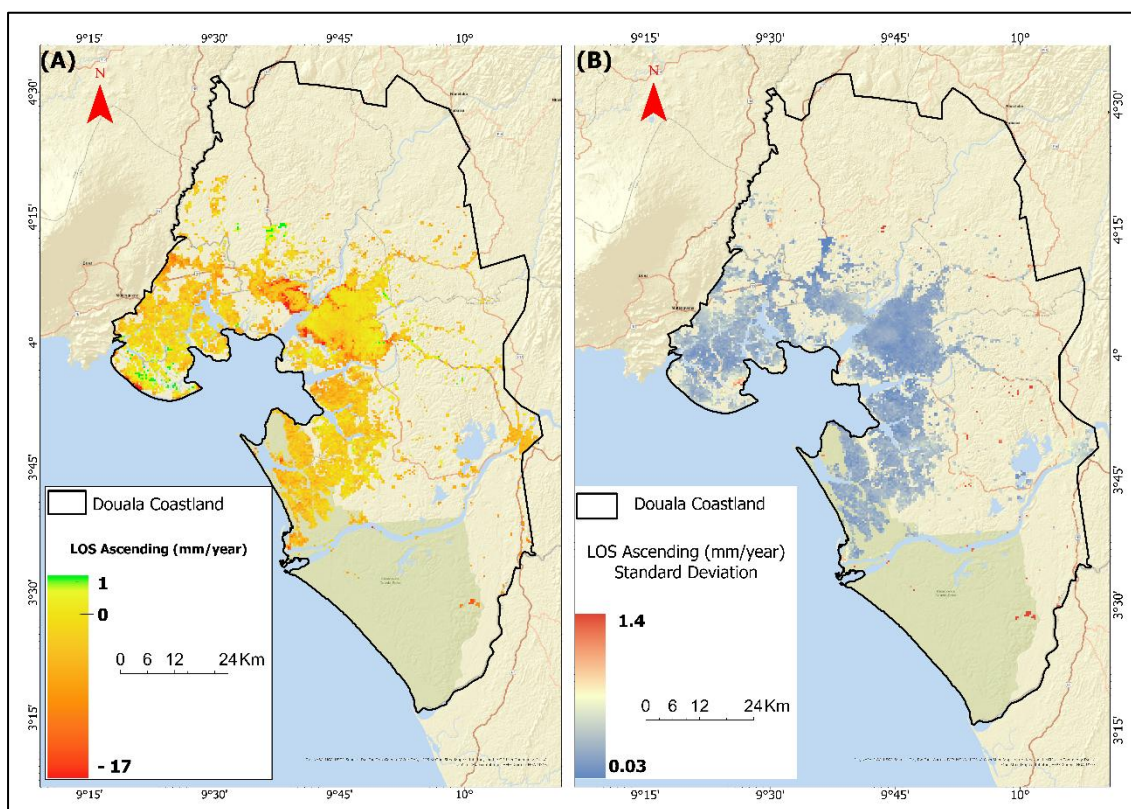

**Figs. S1:** The LOS displacement velocities (A) and associated standard deviation values (B) for the ascending orbit geometries.

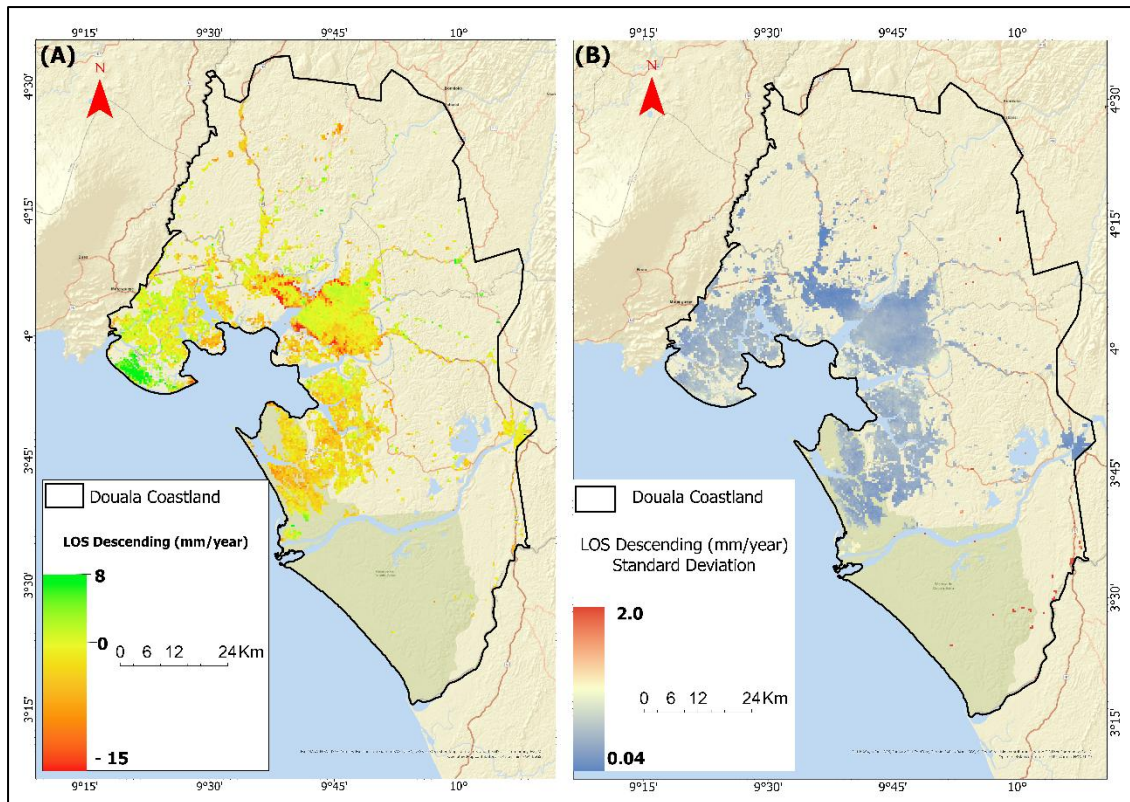

**Figs. S2:** The LOS displacement velocities (A) and associated standard deviation values (B) for the descending orbit geometries.

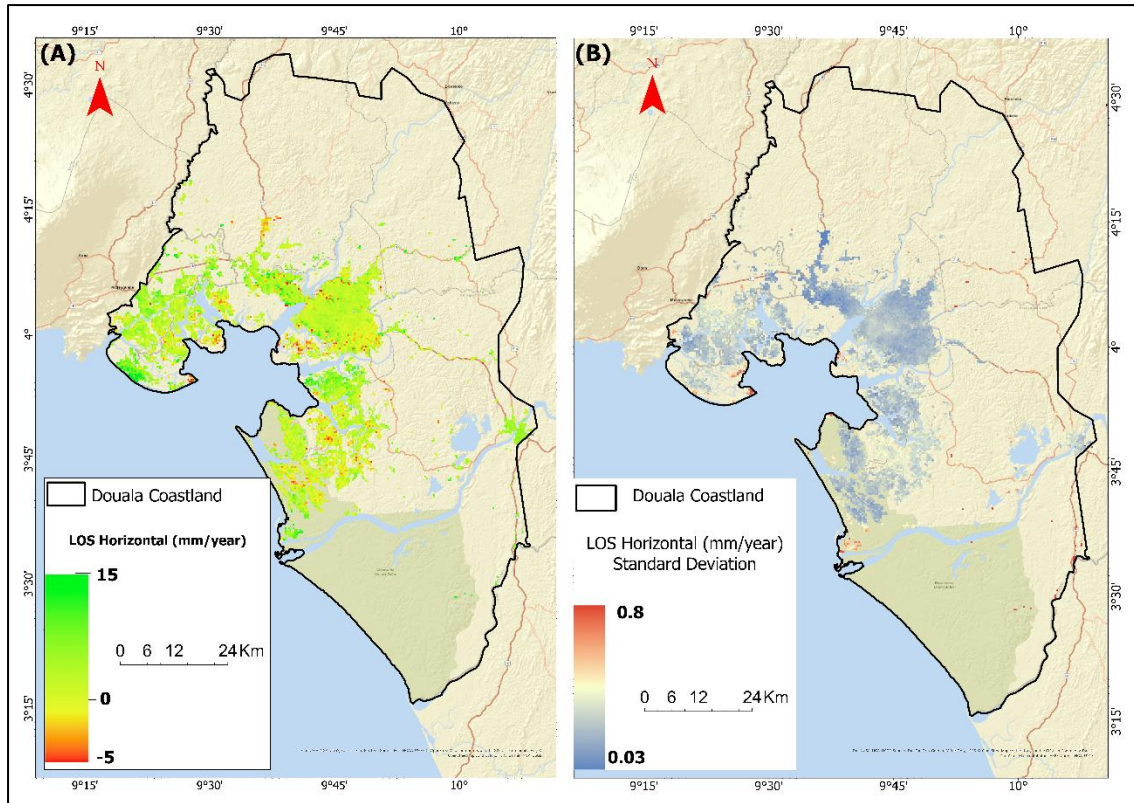

**Figs. S3:** Horizontal displacement velocities (A) and associated standard deviation values (B).

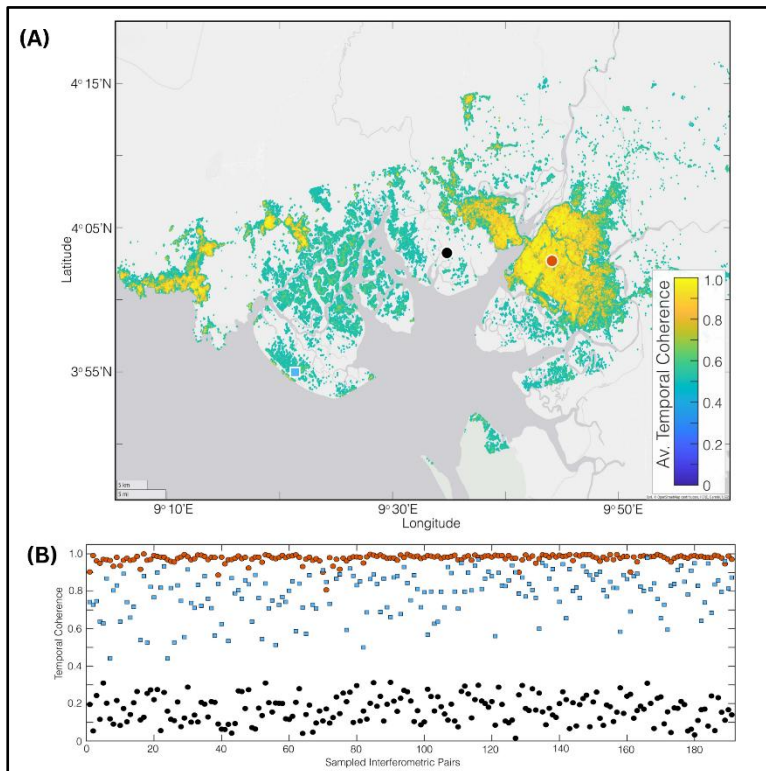

**Figs. S4:** A mean coherence map (A) and representative coherence time series for interferometric pairs from urban, peri-urban, and discarded pixels (B).



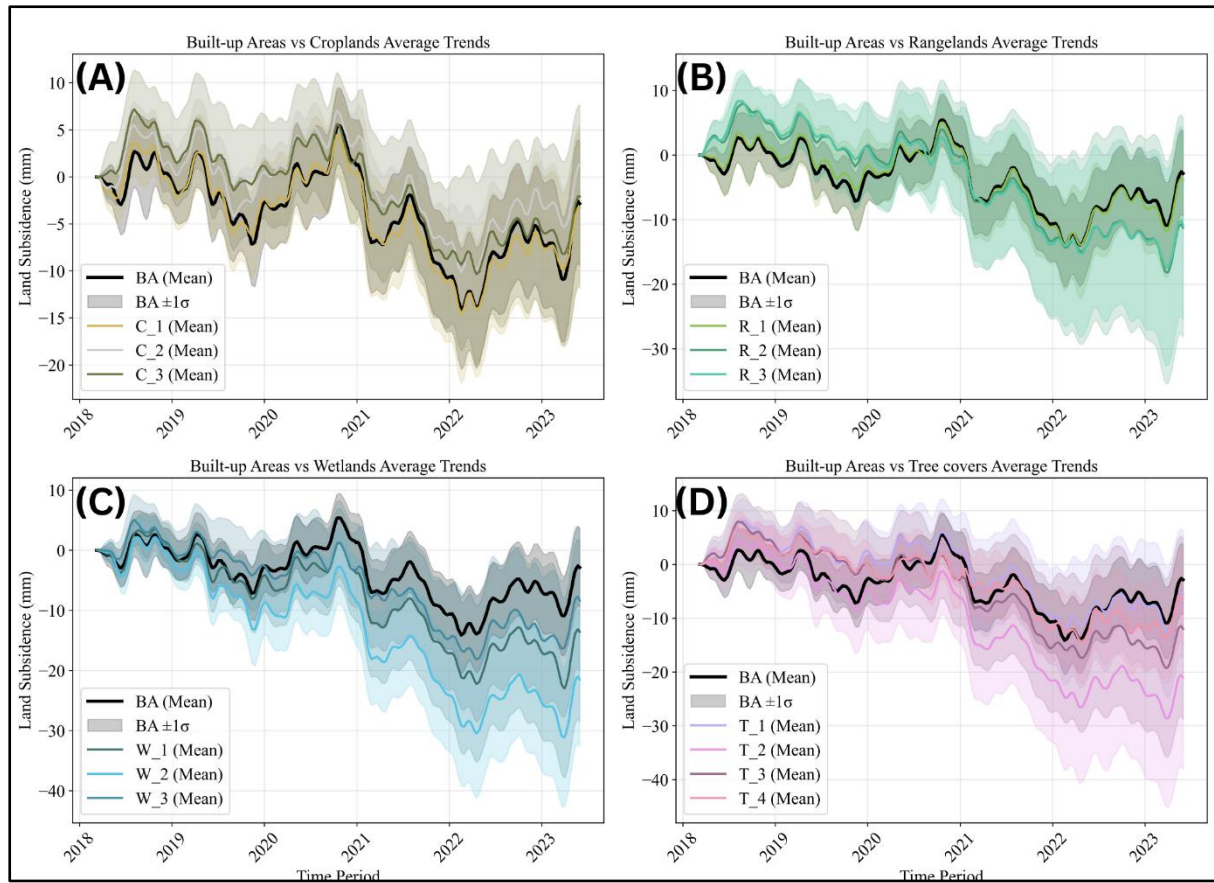

**Figs. S5:** Average InSAR-derived land subsidence time series for areas classified as Built-up Areas (BA) since 1992 (black thick line in each subpanel), compared with the average displacement time series derived for the zones that experienced the LULC trajectories highlighted in Table 6 and Figure 9, i.e. from (A) Croplands to built-up, (B) Rangelands to built-up, (C) Wetlands to built-up, and (D) Tree cover areas to built-up land between 1992 and 2022. The subpanel provides the average trend (coloured line) and the associated standard deviation (shaded bandwidth with the same colour). Notice that the figure uses the same colour scales as used in Figure 9 to characterize each LULC trajectory.

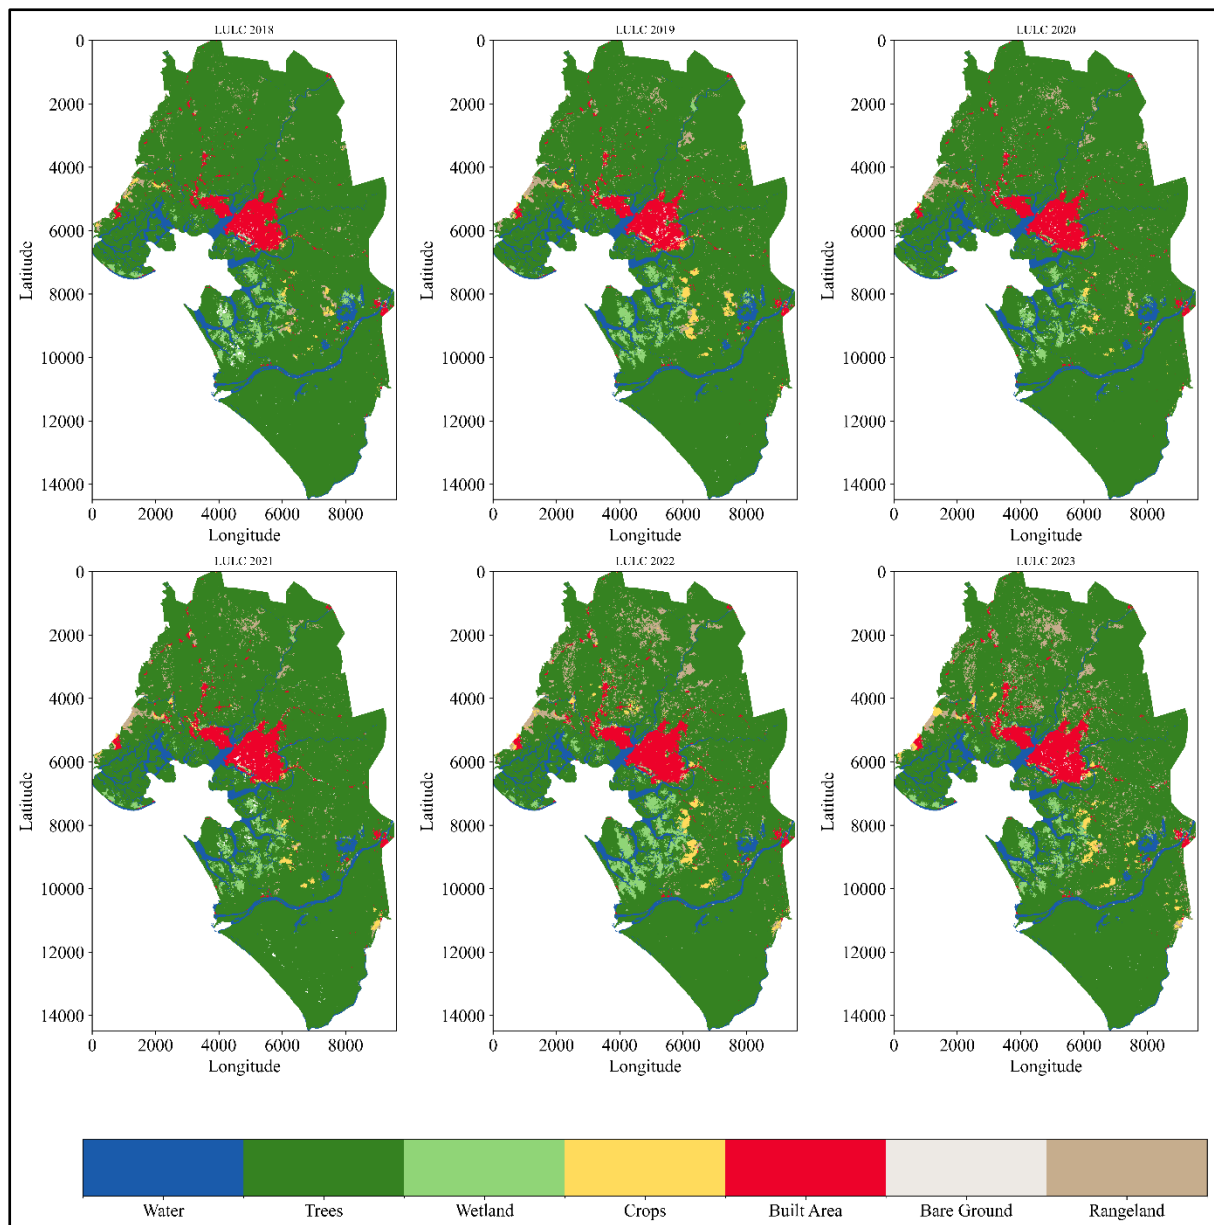

**Fig. S6:** Annual land use maps of the Douala coastland between 2018 and 2023, coinciding with InSAR measurement period

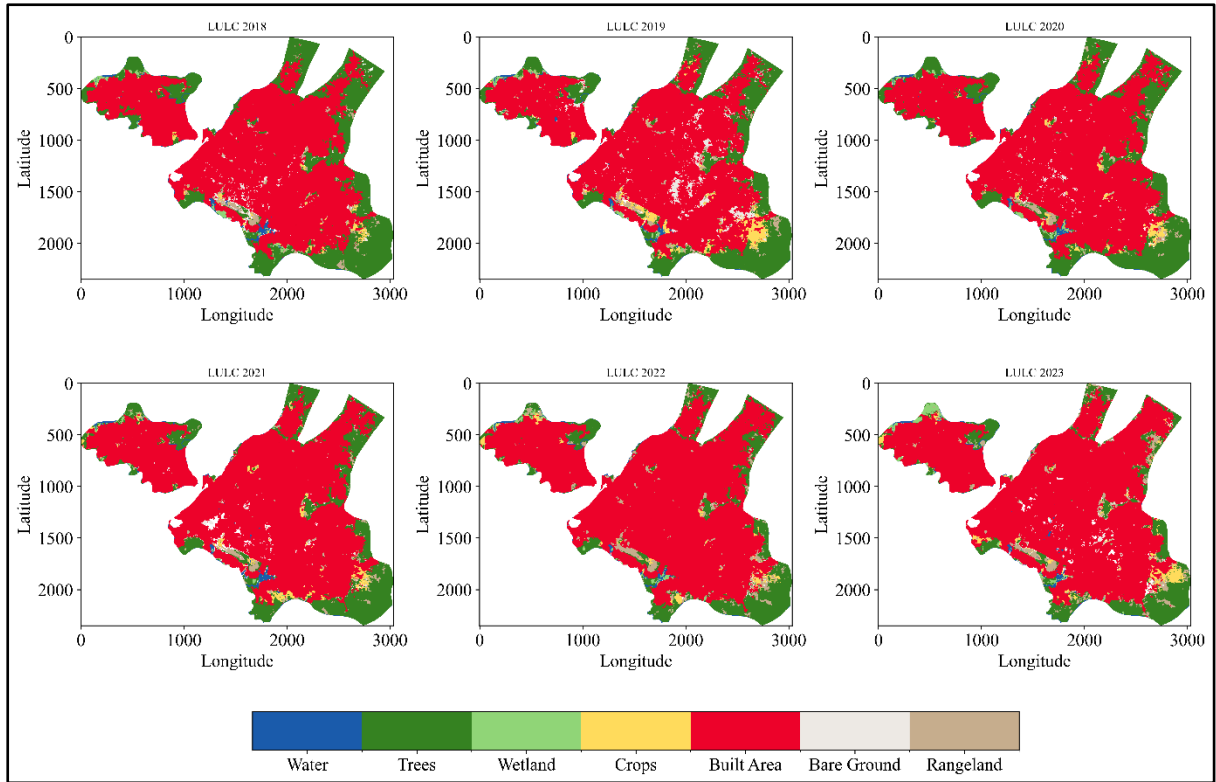

**Fig. S7:** Annual land use maps of the Douala urban zones between 2018 and 2023, coinciding with InSAR measurement period

**Table S1:** Inventory of images of the SAR frame

| Ascending, Frame 132, Path 1192 |       |     | Descending, Frame 51, Paths 575 & 580 |       |     |
|---------------------------------|-------|-----|---------------------------------------|-------|-----|
| Year                            | Month | Day | Year                                  | Month | Day |
| 2018                            | 3     | 15  | 2018                                  | 3     | 10  |
| 2018                            | 3     | 27  | 2018                                  | 3     | 22  |
| 2018                            | 4     | 8   | 2018                                  | 4     | 3   |
| 2018                            | 4     | 20  | 2018                                  | 4     | 15  |
| 2018                            | 5     | 2   | 2018                                  | 4     | 27  |
| 2018                            | 5     | 14  | 2018                                  | 5     | 9   |
| 2018                            | 5     | 26  | 2018                                  | 5     | 21  |
| 2018                            | 6     | 7   | 2018                                  | 6     | 14  |
| 2018                            | 6     | 19  | 2018                                  | 6     | 26  |
| 2018                            | 7     | 1   | 2018                                  | 7     | 8   |
| 2018                            | 7     | 13  | 2018                                  | 7     | 20  |
| 2018                            | 7     | 25  | 2018                                  | 8     | 1   |
| 2018                            | 8     | 6   | 2018                                  | 8     | 25  |
| 2018                            | 8     | 18  | 2018                                  | 9     | 6   |
| 2018                            | 8     | 30  | 2018                                  | 9     | 18  |
| 2018                            | 9     | 11  | 2018                                  | 9     | 30  |
| 2018                            | 9     | 23  | 2018                                  | 10    | 12  |

|      |    |    |      |    |    |
|------|----|----|------|----|----|
| 2018 | 10 | 5  | 2018 | 10 | 24 |
| 2018 | 10 | 17 | 2018 | 11 | 5  |
| 2018 | 10 | 29 | 2018 | 11 | 17 |
| 2018 | 11 | 10 | 2018 | 11 | 29 |
| 2018 | 11 | 22 | 2018 | 12 | 11 |
| 2018 | 12 | 4  | 2018 | 12 | 23 |
| 2018 | 12 | 16 | 2019 | 1  | 4  |
| 2018 | 12 | 28 | 2019 | 1  | 16 |
| 2019 | 1  | 9  | 2019 | 1  | 28 |
| 2019 | 1  | 21 | 2019 | 2  | 9  |
| 2019 | 2  | 2  | 2019 | 2  | 21 |
| 2019 | 2  | 14 | 2019 | 3  | 5  |
| 2019 | 2  | 26 | 2019 | 3  | 17 |
| 2019 | 3  | 10 | 2019 | 3  | 29 |
| 2019 | 3  | 22 | 2019 | 4  | 10 |
| 2019 | 4  | 3  | 2019 | 4  | 22 |
| 2019 | 4  | 15 | 2019 | 5  | 4  |
| 2019 | 4  | 27 | 2019 | 5  | 16 |
| 2019 | 5  | 9  | 2019 | 5  | 28 |
| 2019 | 5  | 21 | 2019 | 6  | 9  |
| 2019 | 6  | 2  | 2019 | 6  | 21 |
| 2019 | 6  | 14 | 2019 | 7  | 3  |
| 2019 | 6  | 26 | 2019 | 7  | 15 |
| 2019 | 7  | 8  | 2019 | 7  | 27 |
| 2019 | 7  | 20 | 2019 | 8  | 8  |
| 2019 | 8  | 1  | 2019 | 8  | 20 |
| 2019 | 8  | 13 | 2019 | 9  | 1  |
| 2019 | 8  | 25 | 2019 | 9  | 13 |
| 2019 | 9  | 6  | 2019 | 9  | 25 |
| 2019 | 9  | 18 | 2019 | 10 | 7  |
| 2019 | 9  | 30 | 2019 | 10 | 19 |
| 2019 | 10 | 12 | 2019 | 10 | 31 |
| 2019 | 10 | 24 | 2019 | 11 | 12 |
| 2019 | 11 | 5  | 2019 | 11 | 24 |
| 2019 | 11 | 17 | 2019 | 12 | 6  |
| 2019 | 11 | 29 | 2019 | 12 | 18 |
| 2019 | 12 | 11 | 2019 | 12 | 30 |
| 2019 | 12 | 23 | 2020 | 1  | 11 |
| 2020 | 1  | 4  | 2020 | 1  | 23 |
| 2020 | 1  | 16 | 2020 | 2  | 4  |
| 2020 | 1  | 28 | 2020 | 2  | 16 |
| 2020 | 2  | 9  | 2020 | 2  | 28 |
| 2020 | 2  | 21 | 2020 | 3  | 11 |
| 2020 | 3  | 4  | 2020 | 3  | 23 |
| 2020 | 3  | 16 | 2020 | 4  | 4  |
| 2020 | 3  | 28 | 2020 | 4  | 16 |

|      |    |    |      |    |    |
|------|----|----|------|----|----|
| 2020 | 4  | 9  | 2020 | 4  | 28 |
| 2020 | 4  | 21 | 2020 | 5  | 10 |
| 2020 | 5  | 3  | 2020 | 5  | 22 |
| 2020 | 5  | 15 | 2020 | 6  | 3  |
| 2020 | 5  | 27 | 2020 | 6  | 15 |
| 2020 | 6  | 8  | 2020 | 6  | 27 |
| 2020 | 6  | 20 | 2020 | 7  | 9  |
| 2020 | 7  | 2  | 2020 | 7  | 21 |
| 2020 | 7  | 14 | 2020 | 8  | 2  |
| 2020 | 7  | 26 | 2020 | 8  | 14 |
| 2020 | 8  | 7  | 2020 | 9  | 7  |
| 2020 | 8  | 19 | 2020 | 9  | 19 |
| 2020 | 8  | 31 | 2020 | 10 | 1  |
| 2020 | 9  | 12 | 2020 | 10 | 13 |
| 2020 | 9  | 24 | 2020 | 10 | 25 |
| 2020 | 10 | 6  | 2020 | 11 | 6  |
| 2020 | 10 | 18 | 2020 | 11 | 18 |
| 2020 | 10 | 30 | 2020 | 11 | 30 |
| 2020 | 11 | 11 | 2020 | 12 | 12 |
| 2020 | 11 | 23 | 2020 | 12 | 24 |
| 2020 | 12 | 5  | 2021 | 1  | 5  |
| 2020 | 12 | 29 | 2021 | 1  | 17 |
| 2021 | 1  | 10 | 2021 | 1  | 29 |
| 2021 | 1  | 22 | 2021 | 2  | 10 |
| 2021 | 2  | 3  | 2021 | 2  | 22 |
| 2021 | 2  | 15 | 2021 | 3  | 6  |
| 2021 | 2  | 27 | 2021 | 3  | 18 |
| 2021 | 3  | 11 | 2021 | 3  | 30 |
| 2021 | 3  | 23 | 2021 | 4  | 11 |
| 2021 | 4  | 4  | 2021 | 4  | 23 |
| 2021 | 4  | 16 | 2021 | 5  | 5  |
| 2021 | 4  | 28 | 2021 | 5  | 17 |
| 2021 | 5  | 10 | 2021 | 5  | 29 |
| 2021 | 5  | 22 | 2021 | 6  | 10 |
| 2021 | 6  | 3  | 2021 | 6  | 22 |
| 2021 | 6  | 15 | 2021 | 7  | 4  |
| 2021 | 6  | 27 | 2021 | 7  | 16 |
| 2021 | 7  | 9  | 2021 | 7  | 28 |
| 2021 | 7  | 21 | 2021 | 8  | 9  |
| 2021 | 8  | 2  | 2021 | 8  | 21 |
| 2021 | 8  | 14 | 2021 | 9  | 2  |
| 2021 | 8  | 26 | 2021 | 9  | 14 |
| 2021 | 9  | 7  | 2021 | 9  | 26 |
| 2021 | 9  | 19 | 2021 | 10 | 8  |
| 2021 | 10 | 1  | 2021 | 10 | 20 |
| 2021 | 10 | 13 | 2021 | 11 | 1  |



|      |    |    |      |    |    |
|------|----|----|------|----|----|
| 2021 | 10 | 25 | 2021 | 11 | 13 |
| 2021 | 11 | 6  | 2021 | 11 | 25 |
| 2021 | 11 | 18 | 2021 | 12 | 7  |
| 2021 | 11 | 30 | 2021 | 12 | 19 |
| 2021 | 12 | 12 | 2021 | 12 | 31 |
| 2021 | 12 | 24 | 2022 | 1  | 12 |
| 2022 | 1  | 5  | 2022 | 1  | 24 |
| 2022 | 1  | 17 | 2022 | 2  | 5  |
| 2022 | 1  | 29 | 2022 | 2  | 17 |
| 2022 | 2  | 10 | 2022 | 3  | 1  |
| 2022 | 2  | 22 | 2022 | 3  | 13 |
| 2022 | 3  | 6  | 2022 | 3  | 25 |
| 2022 | 3  | 18 | 2022 | 4  | 6  |
| 2022 | 3  | 30 | 2022 | 4  | 18 |
| 2022 | 4  | 11 | 2022 | 4  | 30 |
| 2022 | 4  | 23 | 2022 | 5  | 12 |
| 2022 | 5  | 5  | 2022 | 6  | 5  |
| 2022 | 5  | 17 | 2022 | 6  | 17 |
| 2022 | 5  | 29 | 2022 | 6  | 29 |
| 2022 | 6  | 10 | 2022 | 7  | 11 |
| 2022 | 6  | 22 | 2022 | 7  | 23 |
| 2022 | 7  | 4  | 2022 | 8  | 4  |
| 2022 | 7  | 16 | 2022 | 8  | 16 |
| 2022 | 7  | 28 | 2022 | 8  | 28 |
| 2022 | 8  | 9  | 2022 | 10 | 3  |
| 2022 | 8  | 21 | 2022 | 10 | 15 |
| 2022 | 9  | 2  | 2022 | 10 | 27 |
| 2022 | 9  | 14 | 2022 | 11 | 8  |
| 2022 | 9  | 26 | 2022 | 11 | 20 |
| 2022 | 10 | 8  | 2022 | 12 | 2  |
| 2022 | 11 | 1  | 2022 | 12 | 14 |
| 2022 | 11 | 13 | 2022 | 12 | 26 |
| 2022 | 11 | 25 | 2023 | 1  | 7  |
| 2022 | 12 | 7  | 2023 | 1  | 31 |
| 2022 | 12 | 19 | 2023 | 2  | 12 |
| 2022 | 12 | 31 | 2023 | 2  | 24 |
| 2023 | 1  | 12 | 2023 | 3  | 8  |
| 2023 | 1  | 24 | 2023 | 3  | 20 |
| 2023 | 2  | 5  | 2023 | 4  | 1  |
| 2023 | 2  | 17 | 2023 | 4  | 13 |
| 2023 | 3  | 1  | 2023 | 4  | 25 |
| 2023 | 3  | 13 | 2023 | 5  | 7  |
| 2023 | 3  | 25 | 2023 | 5  | 19 |
| 2023 | 4  | 6  | 2023 | 5  | 31 |
| 2023 | 4  | 18 | 2023 | 6  | 12 |
| 2023 | 4  | 30 |      |    |    |

|      |   |    |  |  |  |
|------|---|----|--|--|--|
| 2023 | 5 | 12 |  |  |  |
| 2023 | 5 | 24 |  |  |  |
| 2023 | 6 | 5  |  |  |  |
| 2023 | 6 | 17 |  |  |  |

33

34

35

36
